# Supplementary material
Source: PubMed Central journal article supplement (PMC4198458)

| <i>Patient</i> | <i>Age/Sex</i> | <i>Tumor type and site</i>                           | <i>TNM</i> |
|----------------|----------------|------------------------------------------------------|------------|
| HN 19          | 59/M           | Squamous cell carcinoma, right lateral tongue        | N/A        |
| HN 20          | 92/F           | Squamous cell carcinoma, floor of mouth              | N/A        |
| HN 21          | 50/M           | Squamous cell carcinoma, lateral tongue              | N/A        |
| HN 24          | 59/M           | Squamous cell carcinoma, larynx                      | T2N0M0     |
| HN 26          | 49/F           | Squamous cell carcinoma, lateral surface of tongue   | T4N2M0     |
| HN 34          | 71/M           | Squamous cell carcinoma, anterior floor of the mouth | T4N1M0     |
| HN 36          | 58/M           | Squamous cell carcinoma, floor of the mouth          | T4N0M0     |

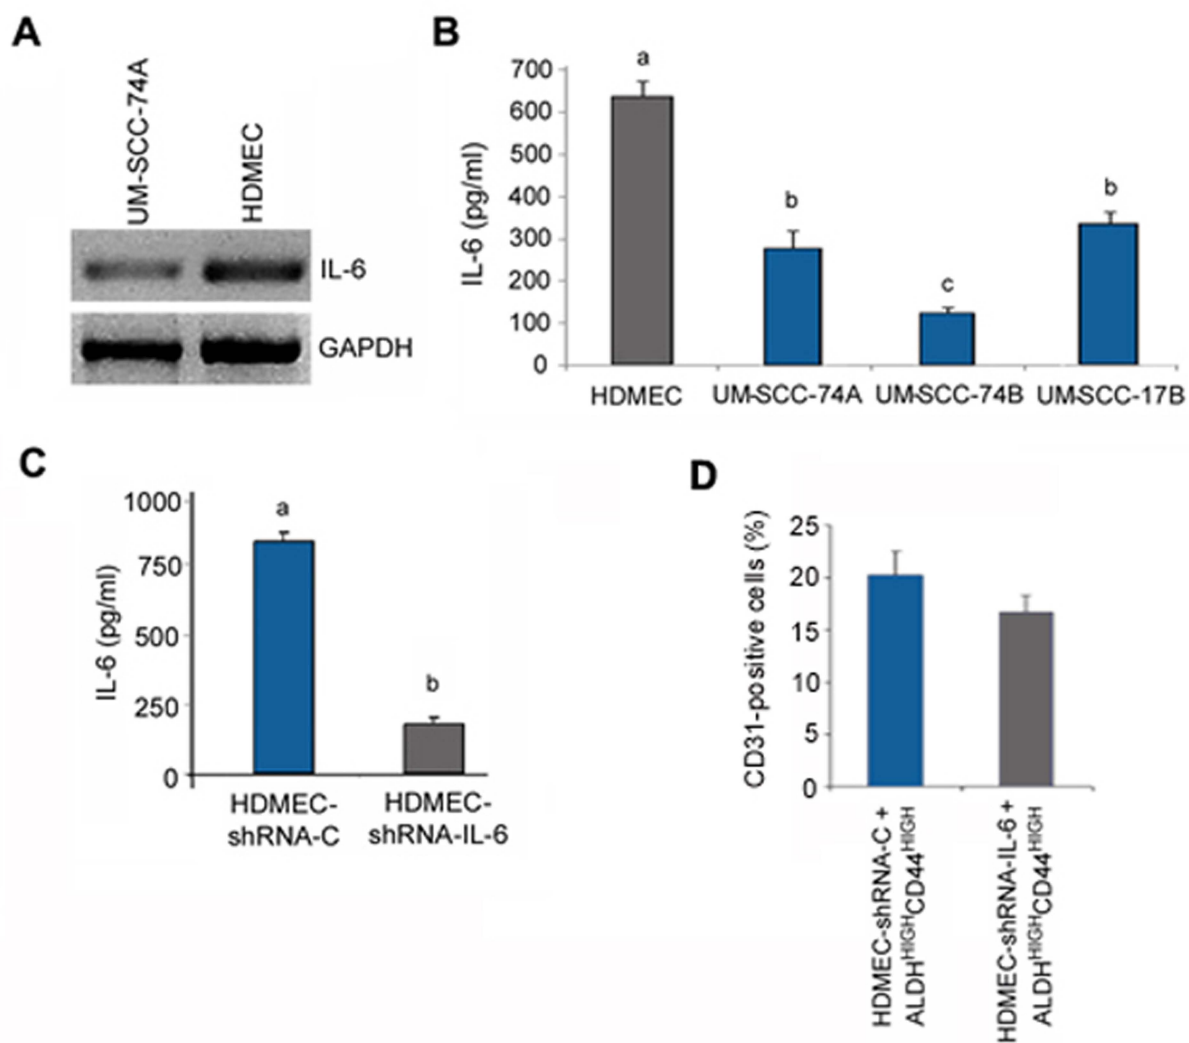

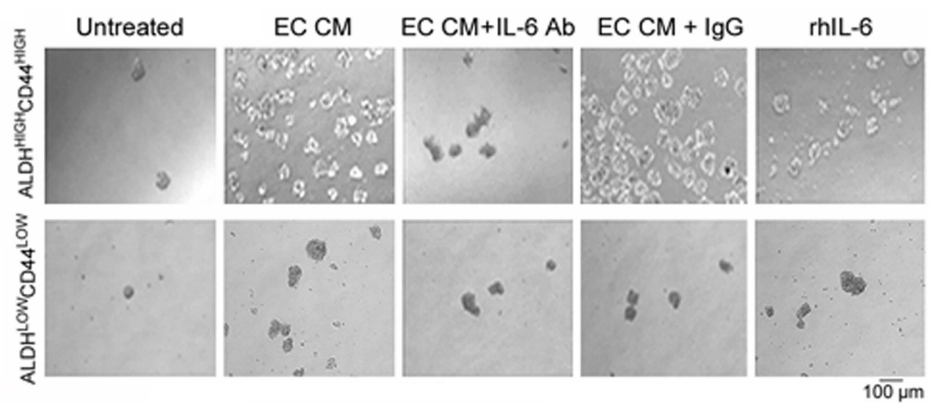

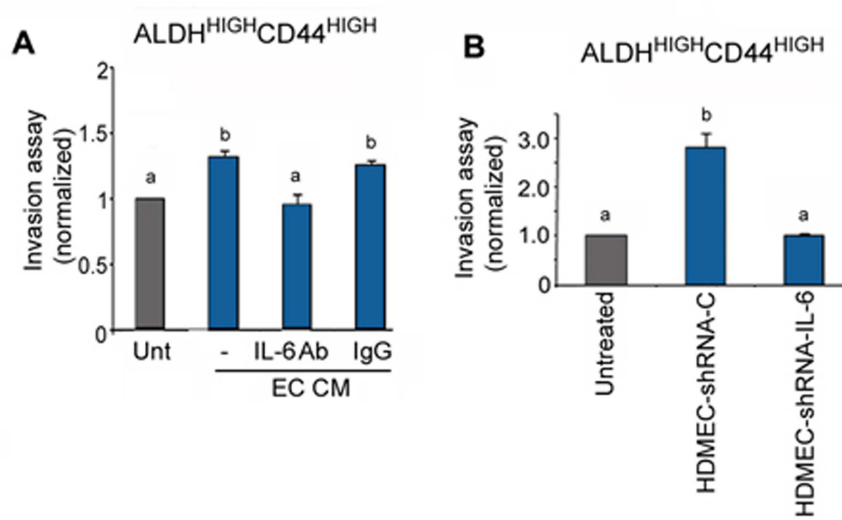

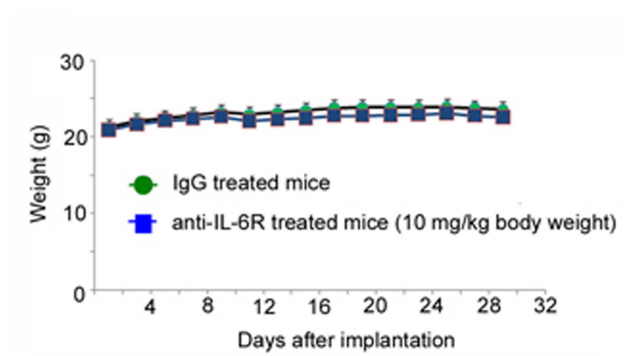

Supplement: NIHMS616326-supplement-Supp_FigureS1-S5.pdf [file NIHMS616326-supplement-Supp_FigureS1-S5.pdf]
